# Supplementary material for: Radiotherapy Side Effects: Comprehensive Proteomic Study Unraveled Neural Stem Cell Degenerative Differentiation upon Ionizing Radiation
Source: MDPI journal article supplement (doi:10.3390/biom12121759), 2022-11-26
Supplement: s1 [file s1]

Table S1. Primer information

| Gene Name           | Sequence (5'-3')                                       | Product length (bp) |
|---------------------|--------------------------------------------------------|---------------------|
| Nestin              | F: CTCGAGCAGGAAGTGGTAGG<br>R: GCCTCTTTTGGTTCCTTTCC     | 140                 |
| Sox2                | F: GAACGCCTTCATGGTATGGT<br>R: TCTCGGTCTCGGACAAAAGT     | 125                 |
| Neurog1             | F: CACCACTCTCTGACCCAGT<br>R: GTCGTGTGGAGCAGGTCTTT      | 109                 |
| Ki67                | F: ATCCAGATGATGGAGCCAAG<br>R: ATTTCTGCAGCTGGTTTGCT     | 139                 |
| p57                 | F: GGAGCAGGACGAGAATCAAG<br>R: GTTCTCCTGCGCAGTTCTCT     | 145                 |
| p21                 | F: ACGGTGGAACCTTGACTTCGTC<br>R: CAGAGTGCAAGACAGCGACAAG | 214                 |
| p27                 | F: GCGGTGCCTTTAATTGGGTCT<br>R: GGCTTCTTGGGCGTCTGCT     | 230                 |
| $\beta$ III-tubulin | Qiagen, QT01227128                                     | 85                  |
| Olig2               | Qiagen, QT01041089                                     | 73                  |
| Gfap                | Qiagen, QT00101143                                     | 127                 |
| GAPDH               | Qiagen, QT01658692                                     | 144                 |
